# Supplementary material
Source: PubMed Central journal article supplement (PMC2742827)
Supplement: supp_M109.014332_jbc.M109.014332-1.pdf [file supp_M109.014332_jbc.M109.014332-1.pdf]

# Requirement of Cell Cycle and Apoptosis Regulator 1 for target gene activation by Wnt and $\beta$ -catenin and for anchorage-independent growth of human colon carcinoma cells

Chen-Yin Ou<sup>1</sup>, Jeong Hoon Kim<sup>2</sup>, Catherine K. Yang<sup>1</sup>, and Michael R. Stallcup<sup>1</sup>

<sup>1</sup>Department of Biochemistry and Molecular Biology, University of Southern California, Los Angeles, California 90089 USA; and <sup>2</sup>Samsung Medical Center and Center for Clinical Research, Samsung Biomedical Research Institute, Sungkyunkwan University School of Medicine, Seoul, Korea

## Supplementary Information

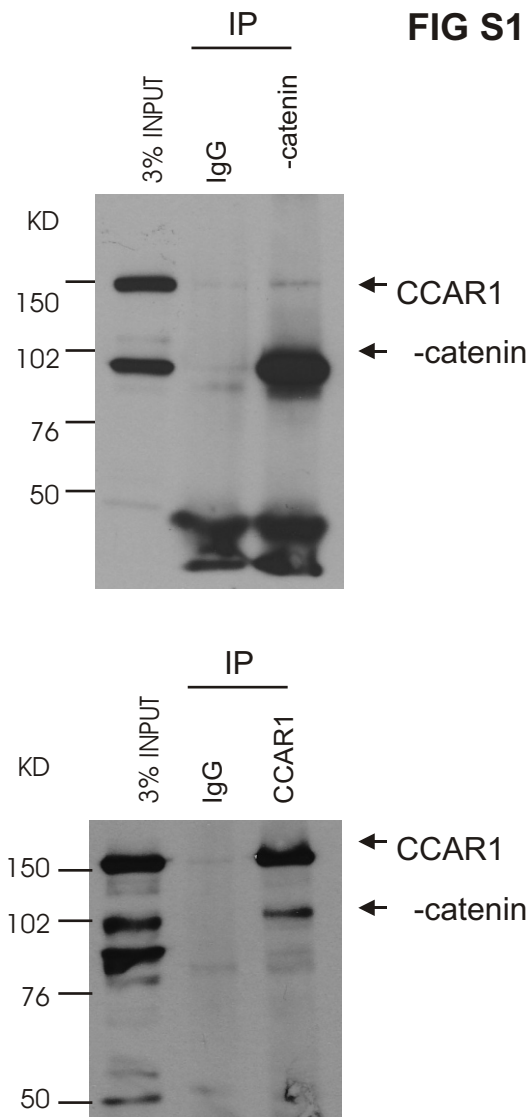

Fig. S1. Interaction between  $\beta$ -catenin and CCAR1. The uncropped images of blots presented in Fig. 1B are shown with molecular weight markers on the left. Co-immunoprecipitation assays were performed as described in Experimental Procedures.

**FIG S2**

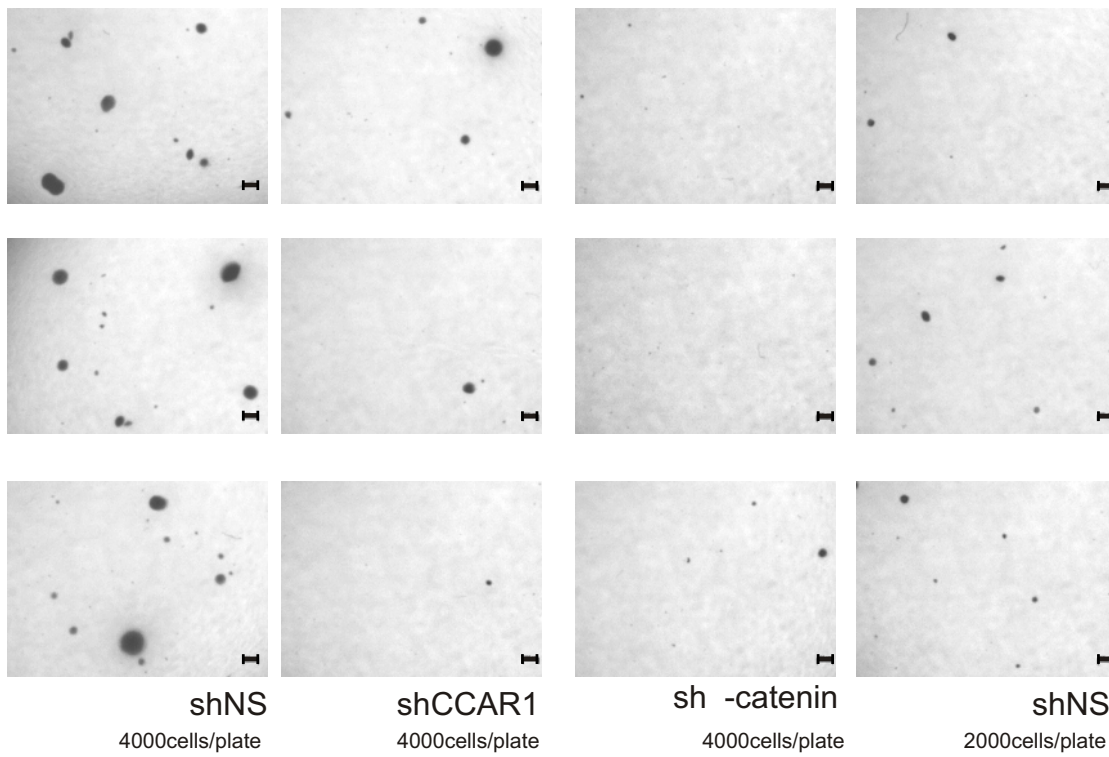

Fig. S2. Role of CCAR1 in anchorage-independent colony formation. Colony numbers shown in Fig. 5B are mean and SD from the triplicate cultures shown here. The scale bar represents 200  $\mu$ m. The soft agar colony formation assay was described in Experimental Procedures.

**FIG S3**

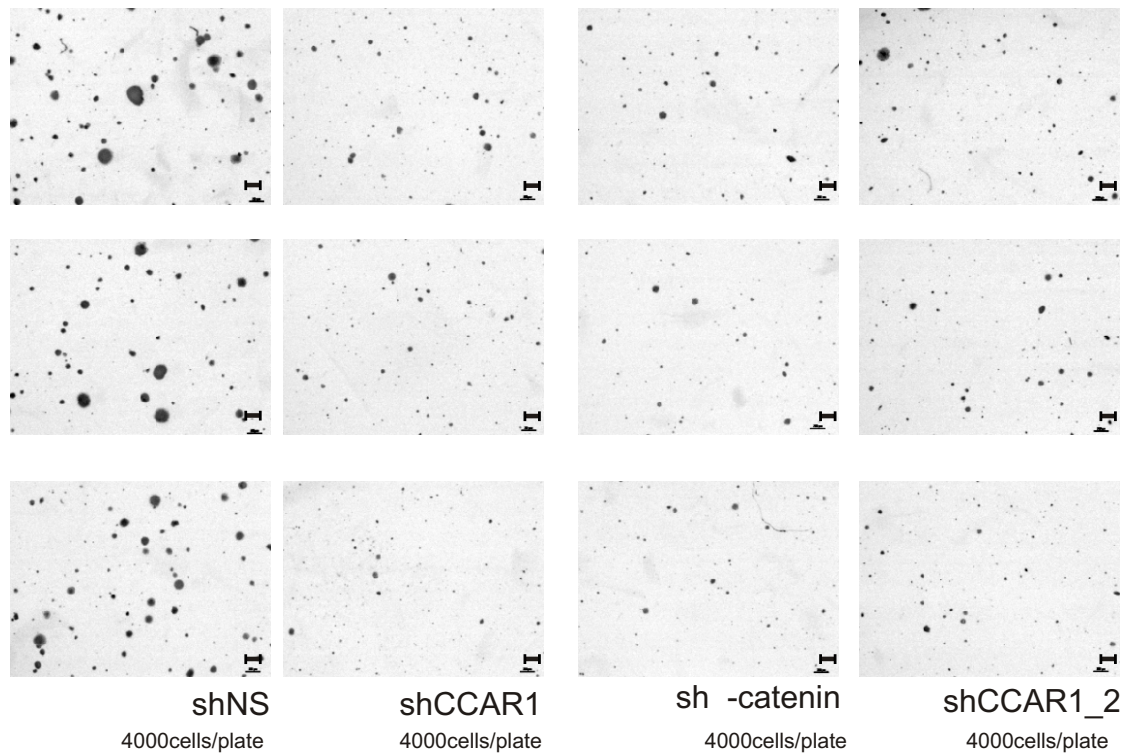

Fig. S3. Role of CCAR1 in anchorage-independent colony formation. The experiment shown here was similar to the one represented in Fig. 5B and Fig. S2, but was performed independently. HT29 cells were infected with lentiviral vectors encoding the indicated shRNAs. Triplicate culture dishes for each condition were tested for colony formation in soft agar. Images of the stained triplicate plates are shown. shCCAR1\_2 was expressed from a lentiviral vector constructed with plasmid pLKO.1-puro-CCAR1, purchased from Sigma. It targets a different part of the CCAR1 mRNA from shCCAR1 used in the remainder of the study.
